# Supplementary material for: Homeostatic Model Assessment of Insulin Resistance for Predicting the Recurrence of Hepatocellular Carcinoma after Curative Treatment
Source: MDPI journal article supplement (doi:10.3390/ijms20030605), 2019-01-30

Supplementary Figure S1

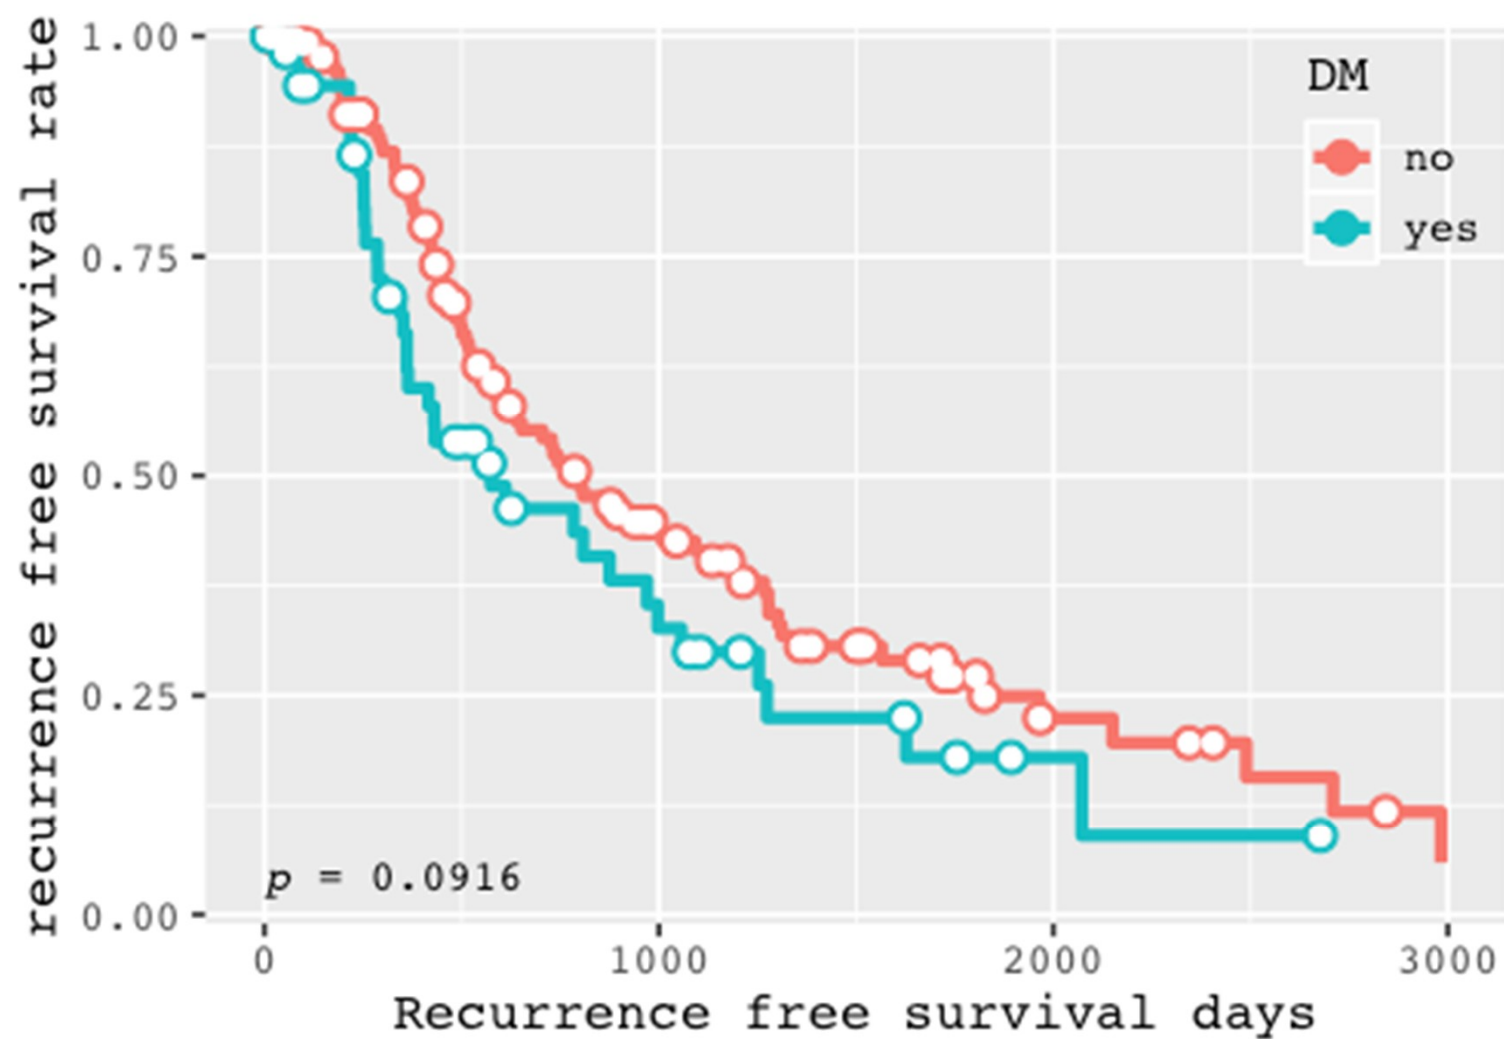

|     |     |    |   |   |
|-----|-----|----|---|---|
| no  | 137 | 40 | 8 | 1 |
| yes | 58  | 12 | 2 | 0 |

## Supplementary Figure S2

(a) HbA1c ( $\geq 6.5$  vs.  $< 6.5$  [%])

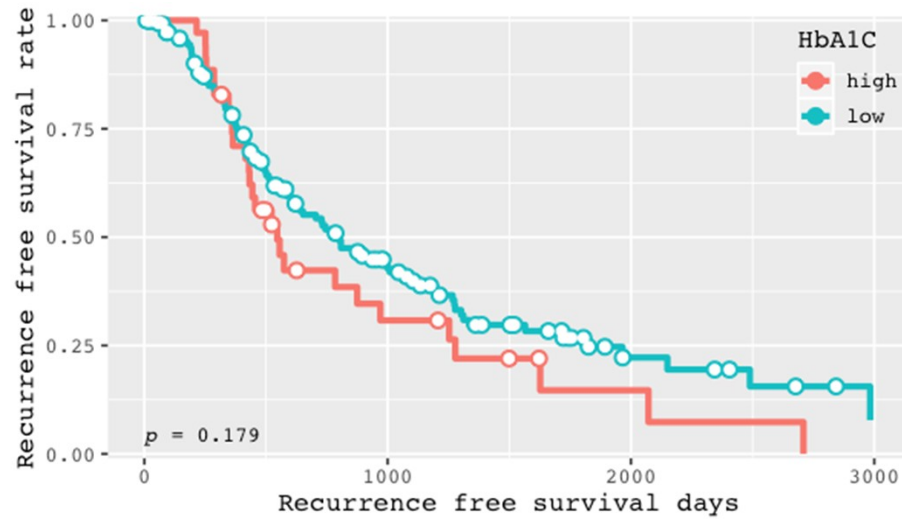

(b) FPG ( $\geq 126$  vs.  $< 126$  [mg/dL])

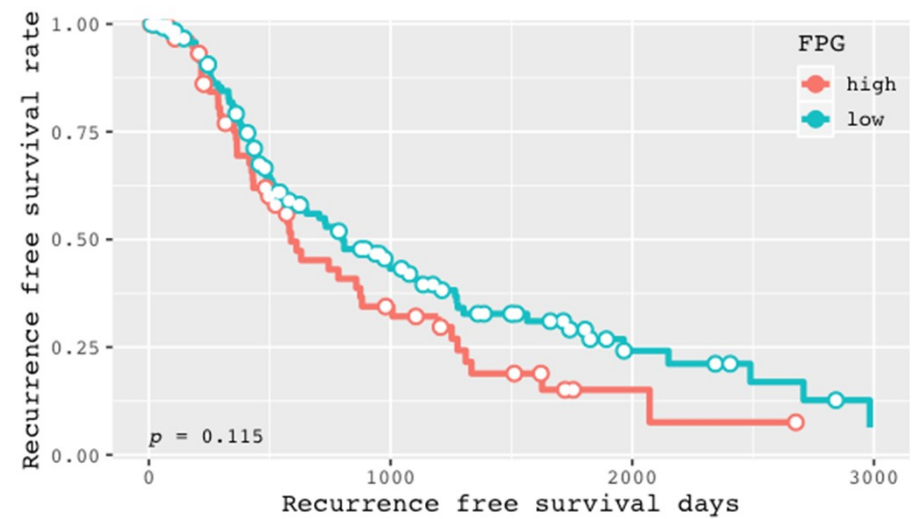

(c) FIRI ( $\geq 10$  vs.  $< 10$  [ $\mu\text{U/mL}$ ])

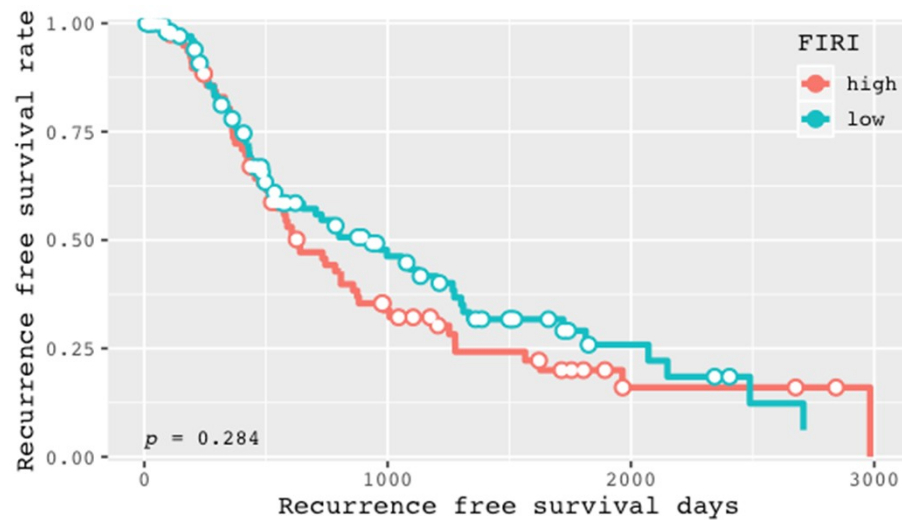

(d) HOMA-IR ( $\geq 2.3$  vs.  $< 2.3$ )

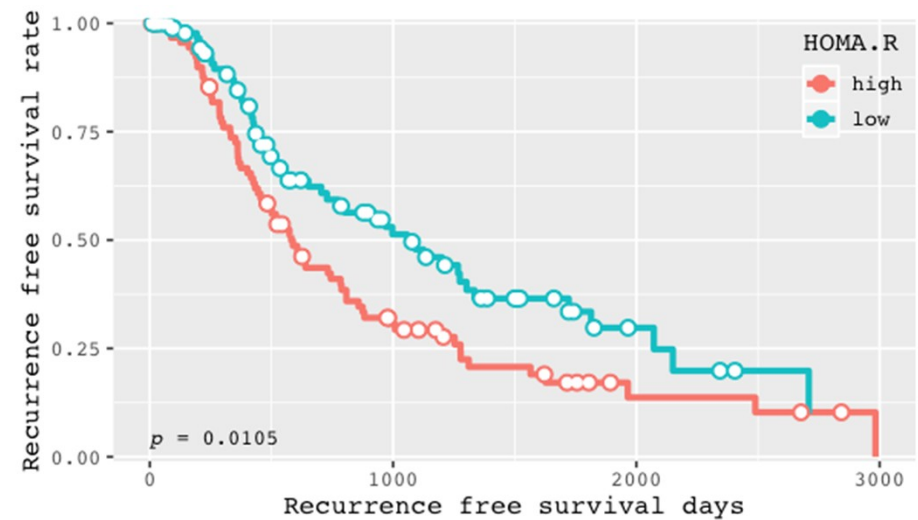

Supplementary Figure S3

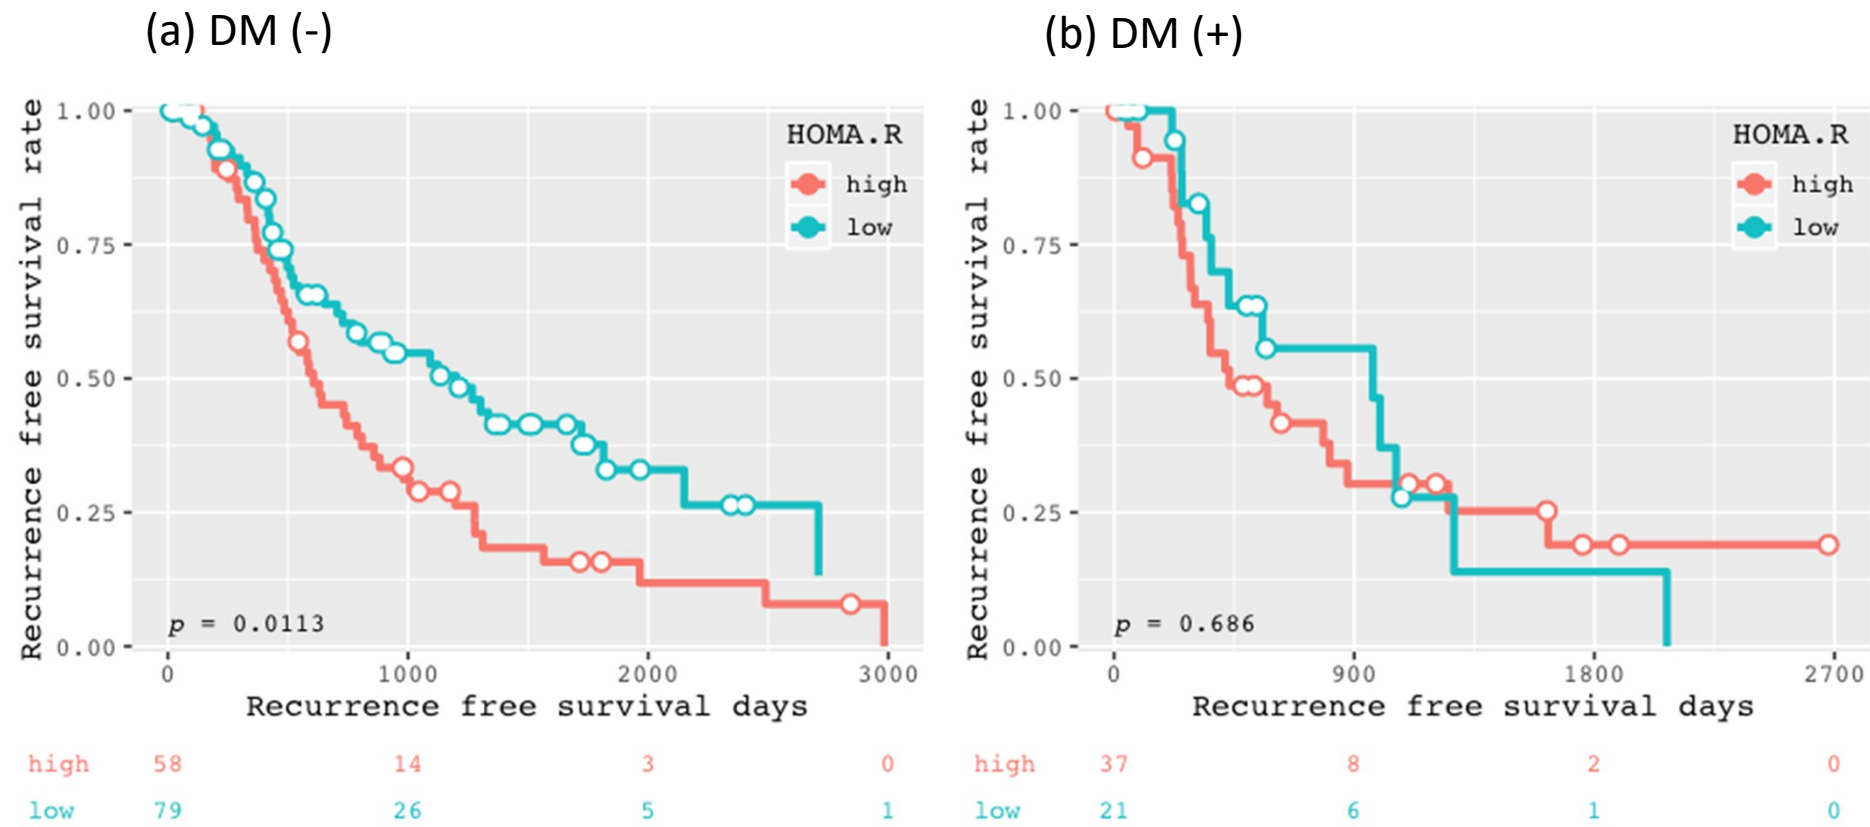

Supplement: s1 [file s1]
